# Supplementary material
Source: MDPI journal article supplement (https://www.mdpi.com/1999-4907/12/6/789)
Supplement: s1 [file s1]

Archive with 5 entries (5 files):
- Supplementary Figures.pdf
- Table S1.xlsx
- Table S2.xlsx
- Table S3.xlsx
- Table S4.pdf
