# Supplementary material
Source: MDPI journal article supplement (https://www.mdpi.com/1999-4907/12/6/789)
Supplement: s1 [file s1 › Table S1.xlsx]

## Sheet: Sheet1
Table S1. Gene ontology classification of different comparisons
BL-60-vs-BL-66				BL-60-vs-BL-72				BL-66-vs-BL-72				BL-CK-60-vs-BL-60				BL-CK-60-vs-BL-66				BL-CK-60-vs-BL-72
Gene ontoloty	GO term	Number of Genes		Gene ontology	GO term	Number of Genes		Gene ontology	GO term	Number of Genes		Gene ontology	GO term	Number of Genes		Gene ontology	GO term	Number of Genes		Gene ontology	GO term	Number of Genes
biological_process	cellular process	56		biological_process	metabolic process	147		biological_process	metabolic process	263		biological_process	metabolic process	6		biological_process	metabolic process	40		biological_process	cellular process	172
biological_process	metabolic process	56		biological_process	cellular process	132		biological_process	cellular process	253		biological_process	cellular process	5		biological_process	cellular process	39		biological_process	metabolic process	166
biological_process	single-organism process	28		biological_process	single-organism process	89		biological_process	single-organism process	169		biological_process	single-organism process	3		biological_process	single-organism process	18		biological_process	single-organism process	121
biological_process	response to stimulus	21		biological_process	biological regulation	37		biological_process	biological regulation	73		biological_process	biological regulation	1		biological_process	response to stimulus	12		biological_process	biological regulation	64
biological_process	biological regulation	18		biological_process	response to stimulus	34		biological_process	response to stimulus	67		biological_process	localization	1		biological_process	biological regulation	11		biological_process	regulation of biological process	54
biological_process	regulation of biological process	17		biological_process	regulation of biological process	31		biological_process	regulation of biological process	65		biological_process	multi-organism process	1		biological_process	regulation of biological process	11		biological_process	localization	45
biological_process	localization	13		biological_process	localization	22		biological_process	localization	51		biological_process	regulation of biological process	1		biological_process	localization	3		biological_process	response to stimulus	45
biological_process	cellular component organization or biogenesis	8		biological_process	cellular component organization or biogenesis	19		biological_process	cellular component organization or biogenesis	31		cellular_component	membrane	5		biological_process	negative regulation of biological process	3		biological_process	cellular component organization or biogenesis	18
biological_process	detoxification	4		biological_process	signaling	9		biological_process	signaling	18		cellular_component	membrane part	3		biological_process	cellular component organization or biogenesis	2		biological_process	signaling	15
biological_process	signaling	4		biological_process	developmental process	7		biological_process	negative regulation of biological process	9		cellular_component	cell	2		biological_process	detoxification	2		biological_process	negative regulation of biological process	9
biological_process	positive regulation of biological process	2		biological_process	multicellular organismal process	6		biological_process	developmental process	8		cellular_component	cell part	2		biological_process	multicellular organismal process	2		biological_process	developmental process	6
biological_process	reproduction	2		biological_process	detoxification	4		biological_process	multicellular organismal process	8		cellular_component	organelle	1		biological_process	reproduction	2		biological_process	multicellular organismal process	5
biological_process	reproductive process	2		biological_process	reproduction	4		biological_process	detoxification	7		molecular_function	binding	6		biological_process	reproductive process	2		biological_process	detoxification	3
biological_process	developmental process	1		biological_process	reproductive process	4		biological_process	positive regulation of biological process	5		molecular_function	catalytic activity	6		biological_process	developmental process	1		biological_process	positive regulation of biological process	3
biological_process	growth	1		biological_process	positive regulation of biological process	3		biological_process	reproduction	3		molecular_function	transporter activity	1		biological_process	immune system process	1		biological_process	multi-organism process	1
biological_process	multi-organism process	1		biological_process	multi-organism process	2		biological_process	reproductive process	3						biological_process	multi-organism process	1		biological_process	reproduction	1
biological_process	multicellular organismal process	1		biological_process	negative regulation of biological process	2		biological_process	multi-organism process	2						biological_process	positive regulation of biological process	1		biological_process	reproductive process	1
biological_process	negative regulation of biological process	1		biological_process	rhythmic process	1		biological_process	rhythmic process	1						biological_process	signaling	1		biological_process	rhythmic process	1
cellular_component	cell	47		cellular_component	cell	87		cellular_component	cell	175						cellular_component	cell	29		cellular_component	cell	120
cellular_component	cell part	47		cellular_component	cell part	84		cellular_component	cell part	171						cellular_component	cell part	29		cellular_component	cell part	118
cellular_component	membrane	47		cellular_component	membrane	73		cellular_component	membrane	155						cellular_component	membrane	22		cellular_component	membrane	103
cellular_component	membrane part	42		cellular_component	membrane part	57		cellular_component	membrane part	137						cellular_component	organelle	22		cellular_component	membrane part	88
cellular_component	organelle	30		cellular_component	organelle	46		cellular_component	organelle	91						cellular_component	membrane part	20		cellular_component	organelle	65
cellular_component	organelle part	15		cellular_component	organelle part	16		cellular_component	organelle part	34						cellular_component	organelle part	13		cellular_component	organelle part	23
cellular_component	macromolecular complex	11		cellular_component	extracellular region	15		cellular_component	macromolecular complex	30						cellular_component	macromolecular complex	11		cellular_component	extracellular region	13
cellular_component	extracellular region	10		cellular_component	macromolecular complex	10		cellular_component	extracellular region	24						cellular_component	extracellular region	4		cellular_component	macromolecular complex	10
cellular_component	extracellular region part	1		cellular_component	membrane-enclosed lumen	4		cellular_component	membrane-enclosed lumen	4						cellular_component	cell junction	1		cellular_component	membrane-enclosed lumen	4
molecular_function	binding	59		cellular_component	nucleoid	1		cellular_component	cell junction	1						cellular_component	supramolecular fiber	1		cellular_component	cell junction	2
molecular_function	catalytic activity	40		molecular_function	catalytic activity	133		cellular_component	extracellular region part	1						cellular_component	symplast	1		cellular_component	symplast	2
molecular_function	transporter activity	12		molecular_function	binding	106		cellular_component	nucleoid	1						molecular_function	binding	31		cellular_component	nucleoid	1
molecular_function	nucleic acid binding transcription factor activity	7		molecular_function	transporter activity	15		cellular_component	symplast	1						molecular_function	catalytic activity	22		molecular_function	catalytic activity	147
molecular_function	antioxidant activity	4		molecular_function	antioxidant activity	4		molecular_function	catalytic activity	221						molecular_function	molecular function regulator	4		molecular_function	binding	138
molecular_function	molecular function regulator	2		molecular_function	nucleic acid binding transcription factor activity	4		molecular_function	binding	206						molecular_function	nucleic acid binding transcription factor activity	2		molecular_function	transporter activity	34
molecular_function	structural molecule activity	2		molecular_function	electron carrier activity	2		molecular_function	transporter activity	37						molecular_function	antioxidant activity	2		molecular_function	nucleic acid binding transcription factor activity	9
molecular_function	nutrient reservoir activity	1		molecular_function	signal transducer activity	2		molecular_function	nucleic acid binding transcription factor activity	11						molecular_function	transporter activity	2		molecular_function	molecular function regulator	8
				molecular_function	molecular function regulator	1		molecular_function	antioxidant activity	7						molecular_function	structural molecule activity	1		molecular_function	antioxidant activity	3
				molecular_function	molecular transducer activity	1		molecular_function	molecular function regulator	6										molecular_function	structural molecule activity	2
				molecular_function	structural molecule activity	1		molecular_function	structural molecule activity	6										molecular_function	electron carrier activity	1
								molecular_function	electron carrier activity	3										molecular_function	molecular transducer activity	1
								molecular_function	molecular transducer activity	3										molecular_function	nutrient reservoir activity	1
								molecular_function	signal transducer activity	3										molecular_function	signal transducer activity	1
								molecular_function	nutrient reservoir activity	2										molecular_function	transcription factor activity, protein binding	1
								molecular_function	transcription factor activity, protein binding	2
