# Supplementary material
Source: MDPI journal article supplement (https://www.mdpi.com/1999-4907/12/6/789)
Supplement: s1 [file s1 › Table S2.xlsx]

## Sheet: Sheet1
Table S2. Kyoto Encyclopedia of Genes and Genomes (KEGG) of different comparisons
BL-60-VS-BL-66				BL-60-VS-BL-72				BL-66-VS-BL-72				BL-CK60-VS-BL-60				BL-CK60-VS-BL-66				BL-CK60-VS-BL-72
Pathway_level1	Pathway_level2	Number_of_Genes		Pathway_level1	Pathway_level2	Number_of_Genes						Pathway_level1	Pathway_level2	Number_of_Genes		Pathway_level1	Pathway_level2	Number_of_Genes		Pathway_level1	Pathway_level2	Number_of_Genes
Cellular Processes	Transport and catabolism	17		Cellular Processes	Transport and catabolism	12		Pathway_level1	Pathway_level2	Number_of_Genes		Genetic Information Processing	Folding, sorting and degradation	1		Cellular Processes	Transport and catabolism	3		Cellular Processes	Transport and catabolism	17
Environmental Information Processing	Signal transduction	16		Environmental Information Processing	Signal transduction	13		Cellular Processes	Transport and catabolism	22		Metabolism	Amino acid metabolism	1		Environmental Information Processing	Signal transduction	1		Environmental Information Processing	Signal transduction	16
Environmental Information Processing	Membrane transport	4		Environmental Information Processing	Membrane transport	5		Environmental Information Processing	Signal transduction	31		Metabolism	Carbohydrate metabolism	1		Genetic Information Processing	Folding, sorting and degradation	5		Environmental Information Processing	Membrane transport	4
Genetic Information Processing	Folding, sorting and degradation	17		Genetic Information Processing	Folding, sorting and degradation	18		Environmental Information Processing	Membrane transport	7		Metabolism	Energy metabolism	1		Genetic Information Processing	Transcription	2		Genetic Information Processing	Folding, sorting and degradation	17
Genetic Information Processing	Translation	17		Genetic Information Processing	Transcription	10		Genetic Information Processing	Folding, sorting and degradation	19		Metabolism	Global and overview maps	1		Genetic Information Processing	Translation	2		Genetic Information Processing	Translation	17
Genetic Information Processing	Transcription	10		Genetic Information Processing	Translation	10		Genetic Information Processing	Translation	16		Metabolism	Metabolism of cofactors and vitamins	1		Metabolism	Global and overview maps	21		Genetic Information Processing	Transcription	10
Genetic Information Processing	Replication and repair	1		Human Diseases	Endocrine and metabolic diseases	6		Genetic Information Processing	Transcription	9		Metabolism	Metabolism of other amino acids	1		Metabolism	Energy metabolism	16		Genetic Information Processing	Replication and repair	1
Human Diseases	Endocrine and metabolic diseases	5		Metabolism	Global and overview maps	81		Genetic Information Processing	Replication and repair	4		Metabolism	Metabolism of terpenoids and polyketides	1		Metabolism	Carbohydrate metabolism	5		Human Diseases	Endocrine and metabolic diseases	5
Metabolism	Global and overview maps	91		Metabolism	Carbohydrate metabolism	23		Human Diseases	Endocrine and metabolic diseases	5		Metabolism	Nucleotide metabolism	1		Metabolism	Biosynthesis of other secondary metabolites	2		Metabolism	Global and overview maps	91
Metabolism	Carbohydrate metabolism	37		Metabolism	Energy metabolism	20		Metabolism	Global and overview maps	132		Organismal Systems	Environmental adaptation	1		Metabolism	Metabolism of cofactors and vitamins	2		Metabolism	Carbohydrate metabolism	37
Metabolism	Amino acid metabolism	24		Metabolism	Biosynthesis of other secondary metabolites	15		Metabolism	Energy metabolism	52						Metabolism	Lipid metabolism	1		Metabolism	Amino acid metabolism	24
Metabolism	Biosynthesis of other secondary metabolites	19		Metabolism	Amino acid metabolism	14		Metabolism	Carbohydrate metabolism	40						Metabolism	Metabolism of other amino acids	1		Metabolism	Biosynthesis of other secondary metabolites	19
Metabolism	Lipid metabolism	18		Metabolism	Lipid metabolism	12		Metabolism	Amino acid metabolism	28						Metabolism	Metabolism of terpenoids and polyketides	1		Metabolism	Lipid metabolism	18
Metabolism	Energy metabolism	14		Metabolism	Metabolism of terpenoids and polyketides	12		Metabolism	Biosynthesis of other secondary metabolites	28						Organismal Systems	Environmental adaptation	4		Metabolism	Energy metabolism	14
Metabolism	Metabolism of other amino acids	14		Metabolism	Metabolism of cofactors and vitamins	10		Metabolism	Lipid metabolism	18										Metabolism	Metabolism of other amino acids	14
Metabolism	Metabolism of terpenoids and polyketides	10		Metabolism	Metabolism of other amino acids	6		Metabolism	Metabolism of terpenoids and polyketides	14										Metabolism	Metabolism of terpenoids and polyketides	10
Metabolism	Metabolism of cofactors and vitamins	9		Metabolism	Nucleotide metabolism	4		Metabolism	Metabolism of other amino acids	13										Metabolism	Metabolism of cofactors and vitamins	9
Metabolism	Glycan biosynthesis and metabolism	5		Metabolism	Glycan biosynthesis and metabolism	3		Metabolism	Metabolism of cofactors and vitamins	11										Metabolism	Glycan biosynthesis and metabolism	5
Metabolism	Nucleotide metabolism	1		Organismal Systems	Environmental adaptation	28		Metabolism	Nucleotide metabolism	7										Metabolism	Nucleotide metabolism	1
Organismal Systems	Environmental adaptation	24						Metabolism	Glycan biosynthesis and metabolism	2										Organismal Systems	Environmental adaptation	24
								Organismal Systems	Environmental adaptation	33

## Sheet: Sheet2
BL-CK60-VS-BL-60				BL-CK60-VS-BL-66				BL-CK60-VS-BL-72
Pathway_level1	Pathway_level2	Number_of_Genes		Pathway_level1	Pathway_level2	Number_of_Genes		Pathway_level1	Pathway_level2	Number_of_Genes
Genetic Information Processing	Folding, sorting and degradation	1		Cellular Processes	Transport and catabolism	3		Cellular Processes	Transport and catabolism	17
Metabolism	Amino acid metabolism	1		Environmental Information Processing	Signal transduction	1		Environmental Information Processing	Signal transduction	16
Metabolism	Carbohydrate metabolism	1		Genetic Information Processing	Folding, sorting and degradation	5		Environmental Information Processing	Membrane transport	4
Metabolism	Energy metabolism	1		Genetic Information Processing	Transcription	2		Genetic Information Processing	Folding, sorting and degradation	17
Metabolism	Global and overview maps	1		Genetic Information Processing	Translation	2		Genetic Information Processing	Translation	17
Metabolism	Metabolism of cofactors and vitamins	1		Metabolism	Global and overview maps	21		Genetic Information Processing	Transcription	10
Metabolism	Metabolism of other amino acids	1		Metabolism	Energy metabolism	16		Genetic Information Processing	Replication and repair	1
Metabolism	Metabolism of terpenoids and polyketides	1		Metabolism	Carbohydrate metabolism	5		Human Diseases	Endocrine and metabolic diseases	5
Metabolism	Nucleotide metabolism	1		Metabolism	Biosynthesis of other secondary metabolites	2		Metabolism	Global and overview maps	91
Organismal Systems	Environmental adaptation	1		Metabolism	Metabolism of cofactors and vitamins	2		Metabolism	Carbohydrate metabolism	37
				Metabolism	Lipid metabolism	1		Metabolism	Amino acid metabolism	24
				Metabolism	Metabolism of other amino acids	1		Metabolism	Biosynthesis of other secondary metabolites	19
				Metabolism	Metabolism of terpenoids and polyketides	1		Metabolism	Lipid metabolism	18
				Organismal Systems	Environmental adaptation	4		Metabolism	Energy metabolism	14
								Metabolism	Metabolism of other amino acids	14
								Metabolism	Metabolism of terpenoids and polyketides	10
								Metabolism	Metabolism of cofactors and vitamins	9
								Metabolism	Glycan biosynthesis and metabolism	5
								Metabolism	Nucleotide metabolism	1
								Organismal Systems	Environmental adaptation	24
