# Supplementary material
Source: MDPI journal article supplement (https://www.mdpi.com/1999-4907/12/6/789)
Supplement: s1 [file s1 › Table S3.xlsx]

## Sheet: Sheet1
Table S3. DEGs identified in different pathways at three time points with respective control (CK60,60h,66h,72h) with expression values in log2(FPKM)
Plant hormone transduction pathway
Auxin	Gene-IDs	BL-CK60	BL-60	BL-66	BL-72
	gene26601	2.3538	2.20341	2.109	1.64299
	gene3728	0.0779732	0.649984	0.570932	0.895607
	gene829	0.350248	0.335792	1.00116	0.181844
Abscisic acid
	gene22236	0.819544	0.737193	1.02146	1.19387
	gene4461	1.74291	1.53003	1.57822	1.35698
	gene9262	0.393283	0.754093	0.379003	0.93044
cytokinin
	gene957	1.65966	1.79957	1.71377	2.02336
	gene30838	1.09307	1.21652	1.24386	1.51032
	gene25497	0.873321	1.23821	0.955688	1.24961
	gene36128	0.579021	0.97143	0.672406	1.03556
Gibberelin
	gene1989	0.860737	1.20737	0.885926	1.36204
Jasmonic acid
	gene13924	1.22634	1.05192	1.30023	0.832296
	gene35754	1.77837	1.61934	1.71999	1.35889
Brassino steroid
	gene3355	0.580545	0.666518	0.937685	1.1682
	gene5477	1.11361	1.11628	1.07773	1.66461
Salicylic acid
	gene24193	0.864511	0.633132	0.492295	0.167317
	gene13913	2.56455	2.49731	2.70435	2.14275
Starch and sucrose metabolism
	gene22213_gene22214	1.06221	1.07164	0.787224	0.429214
	gene19401	-0.728933	0.00288569	0.398519	0.728083
	gene198	0.54324	0.740363	0.435101	0.913814
	gene13275	-0.542623	-0.464284	-0.315753	0.33109
	gene12653	1.54634	1.33432	1.64352	1.15544
	gene19326	0.288547	0.670246	0.854508	0.52677
	gene34549	0.782711	1.00202	1.00332	1.23763
	gene13505	0.658965	0.380814	0.601698	0.166331
	gene10531	1.47693	1.41055	1.09922	0.991964
	gene1118	0.476638	1.12764	1.02749	1.1727
	gene29018	-0.752845	0.150245	0.049218	0.437751
	gene19363	0.580925	0.313164	0.456366	-0.0522396
	gene9499	2.1757	2.3744	2.46681	2.60734
	gene17148	1.53445	1.15188	0.938353	0.48335
	gene30616	0.941843	0.674861	0.661181	0.454845
	gene30297	1.3236	1.1299	1.39933	0.79588
	gene15899	1.64467	1.40266	1.53424	1.23679
Phenoylpropanoid Biosynthesis
	gene12930	1.11272	1.2357	2.08504	0.974512
	gene12931	1.90752	1.83189	2.39493	2.08471
	gene22213_gene22214	1.06221	1.07164	0.787224	0.429214
	gene22265	0.520702	0.364864	0.691671	0.971585
	gene16435	1.40824	1.33014	1.29674	0.938019
	gene10961	1.27898	1.24329	1.15584	0.519828
	gene11550	1.0059	1.03849	0.919427	1.37609
	gene12930	1.11272	1.2357	2.08504	0.974512
	gene8499	0.78438	0.172214	0.586212	0.0114295
	gene34549	0.782711	1.00202	1.00332	1.23763
	gene13505	0.658965	0.380814	0.601698	0.166331
	gene5	2.13829	2.23478	2.40391	2.46551
	gene30616	0.941843	0.674861	0.661181	0.454845
	gene22473	0.00144524	0.531904	0.610305	0.961895
	gene30297	1.3236	1.1299	1.39933	0.79588
Carbon Metabolism
	gene19606	0.64411	0.175125	0.676389	0.147161
	gene30059	0.672098	-0.49485	-0.35327	0.685443
	gene2215	1.11261	1.13651	1.31527	1.52776
	gene16722	1.17007	0.724549	0.404263	1.33122
	gene12209	1.20575	0.761928	0.664329	1.46923
	gene30159	0.296665	0.235528	0.284055	0.788875
	gene30172	1.1329	1.08195	1.1107	1.52066
	gene33114	2.65701	2.2938	2.13832	2.83054
	gene25254	1.48652	0.996658	0.871962	1.69258
	gene19650	1.16266	0.998695	1.08908	1.49536
	gene35747	1.74007	1.48149	1.71983	1.37961
	gene13945	1.36311	1.25551	1.34308	0.93852
	novel_gene_3181_5d1f3751	2.22756	2.20113	2.02284	2.15015
	gene13953	1.24038	0.965515	1.15615	0.765669
	gene26796	1.26285	1.02503	1.21263	0.815578
	gene23954	0.904355	0.760674	0.429214	0.604586
	gene30347	1.97546	1.88658	1.92409	1.6274
	gene33859	0.869623	1.09795	1.05906	1.22651
	gene5533	1.54765	1.2839	1.47426	1.1346
	gene33697	0.182795	0.720986	0.786988	1.00945
