# Supplementary material
Source: MDPI journal article supplement (https://www.mdpi.com/1999-4907/12/6/789)
Supplement: s1 [file s1 › Table S4.pdf]

**Table S4. Sequence of primers used in the qRT-PCR analysis to validate gene expression**

| <b>Gene IDs</b> | <b>Forward primer</b> | <b>Reverse primer</b> |
|-----------------|-----------------------|-----------------------|
| Gene26601       | AAGGTTAGCATGGATGGGGC  | CCCAAGGGACATCTCCAACC  |
| Gene829         | AGCCATCGAAAATGCCTCCA  | CGCACCTCGTGAGATAGCAT  |
| Gene957         | GAAGTGCATAGCGCTTGGTG  | CCAGCAATCTTGACCCCTGT  |
| Gene5477        | GGAGATGGTCGTGCCAAGAT  | TCCCAAATATGACCGGTGCC  |
| Gene9499        | TGAACTCAGCGTGGAGCAAT  | GCAAGGGCTCCAAGGAATCT  |
| Gene30616       | CCAATTGTCCGTGCACCATC  | GTACATGCCTGACGGAACCT  |
| Gene15899       | ACAAAGCTTTCCTGGGCTGT  | TCTGGTCCACTTTGGGCATC  |
| Gene12931       | TGCTTGCCAGTCTCATCAGG  | TTCCAATCTGGACCACCAGC  |
| Gene5           | AAGGCTGGTGGTCCTGATTG  | TCTAGGCTGGAAGAGGGACC  |
| Gene2215        | ATGGAACGGGCGTGGTTATT  | CACACCTTCGGCAACTTTGG  |
| Gene16722       | GCGTTTGGCTTCAATTGGGT  | GACCATTGGGGATGCTCACA  |
| Gene25254       | CACTTGGTGCCTCTGGCATA  | GGGCATCCCAATCAGTGACA  |
| Gene23954       | CAGCCGAGATGTGGACTGTT  | GGAGGAGCACACCGCTTATT  |
| Gene13505       | GTCATGGAAGTTCGTGGGGT  | AAGCCTCCAATGGCTGAGAC  |
| Gene11550       | CCACAGGGTCGTTTATGGCT  | TACACAGGCTTTTCCCACCC  |
| Gene22473       | CAGTTGTCAAAGAGCACCGC  | AAACCCGGCCTCTGAACAAT  |
| Actin           | TTGCCTTGGATTATGAACA   | GATGGCTGGAACAGAACTT   |
